# Supplementary material
Source: HighWire-hosted journal article supplement (doi:10.1101/rna.079904.123)

**Supplementary Data**

**Novel RNA molecular bioengineering technology efficiently produces functional miRNA agents**

Gavin M. Traber, Colleen Yi, Neelu Batra, Mei-Juan Tu, and Ai-Ming Yu\*

Department of Biochemistry and Molecular Medicine, University of California- Davis, School of Medicine, Sacramento, California, 95817, USA

**Supplemental Tables S1 to S4**

**Supplemental Figures 1 to 2**

**Supplemental Table S1.** Sequences of novel BioRNAs bearing target RNAi warheads produced in this study. Underlined, htRNA; Black, hsa-pre-miR-34a; Red and Green, miRNA guide and passenger strand, respectively.

| BioRNA                      | Length (nt) | Sequence (5' to 3')                                                                                                                                                                                                         | MW (Da) |
|-----------------------------|-------------|-----------------------------------------------------------------------------------------------------------------------------------------------------------------------------------------------------------------------------|---------|
| <b>BioRNA<sup>Leu</sup></b> |             |                                                                                                                                                                                                                             |         |
| miR-143b-3p                 | 192         | <u>ACCAGGAUGGCCGAGUGGUUAAGGCGUUGGACUGGCCAGCUGUGAGUGUUUCU</u><br><u>UUGAGAUGAAGCACUGUAGCUCU</u> UGUGAGCAAUAGUAAGGAAGGAGCUGCAUG<br>CAUUCAUCUCUCAGAAGUGCUGCACGUUGUUGGCCCGAUCCAAUGGACAUUAUGU<br>CCGCGUGGGUUCGAACCCACUCCUGGUACCA | 62,093  |
| miR-206-3p                  | 192         | <u>ACCAGGAUGGCCGAGUGGUUAAGGCGUUGGACUGGCCAGCUGUGAGUGUUUCU</u><br>UUGGAAUGUAAGGAAGUGUGUGUGUGAGCAAUAGUAAGGAAUCACACACUCC<br>UGUACAUCUCCUAGAAGUGCUGCACGUUGUUGGCCCGAUCCAAUGGACAUUAUGU<br>CCGCGUGGGUUCGAACCCACUCCUGGUACCA          | 62,117  |
| miR-375-3p                  | 192         | <u>ACCAGGAUGGCCGAGUGGUUAAGGCGUUGGACUGGCCAGCUGUGAGUGUUUCU</u><br>UUUUGUUCGUUCGGCUCGCGUGAUGUGAGCAAUAGUAAGGAAUCGCGCGAGCG<br>ACACGAACAACUAGAAGUGCUGCACGUUGUUGGCCCGAUCCAAUGGACAUUAUGU<br>CCGCGUGGGUUCGAACCCACUCCUGGUACCA         | 62,123  |
| miR-497-5p                  | 192         | <u>ACCAGGAUGGCCGAGUGGUUAAGGCGUUGGACUGGCCAGCUGUGAGUGUUUCU</u><br>UCAGCAGCACACUGUGGUUUUGUUUGUGAGCAAUAGUAAGGAAGGCAAACCAAG<br>UAGUGCUGUUAUAGAAGUGCUGCACGUUGUUGGCCCGAUCCAAUGGACAUUAUG<br>UCCGCGUGGGUUCGAACCCACUCCUGGUACCA        | 62,157  |
| miR-125b-5p                 | 192         | <u>ACCAGGAUGGCCGAGUGGUUAAGGCGUUGGACUGGCCAGCUGUGAGUGUUUCU</u><br>UUCCCUGAGACCCUAACUUGUGAUGUGAGCAAUAGUAAGGAAUCACGGGUUGG<br>GCUCUUGGGGCUAGAAGUGCUGCACGUUGUUGGCCCGAUCCAAUGGACAUUAUG<br>UCCGCGUGGGUUCGAACCCACUCCUGGUACCA         | 62,117  |
| let-7a-5p                   | 192         | <u>ACCAGGAUGGCCGAGUGGUUAAGGCGUUGGACUGGCCAGCUGUGAGUGUUUCU</u><br>UUGAGGUAGUAGGUUGUAUAGUUUGUGAGCAAUAGUAAGGAAAACUGUACACC<br>UGACUACCUUUCAGAAGUGCUGCACGUUGUUGGCCCGAUCCAAUGGACAUUAUGU<br>CCGCGUGGGUUCGAACCCACUCCUGGUACCA         | 62,080  |
| let-7b-5p                   | 192         | <u>ACCAGGAUGGCCGAGUGGUUAAGGCGUUGGACUGGCCAGCUGUGAGUGUUUCU</u><br>UUGAGGUAGUAGGUUGUGUGGUUUGUGAGCAAUAGUAAGGAAAACUGUACACC<br>UGACUACCUUUCAGAAGUGCUGCACGUUGUUGGCCCGAUCCAAUGGACAUUAUGU<br>CCGCGUGGGUUCGAACCCACUCCUGGUACCA         | 62,112  |

|            |     |                                                                                                                                                                                                                                            |        |
|------------|-----|--------------------------------------------------------------------------------------------------------------------------------------------------------------------------------------------------------------------------------------------|--------|
| let-7c-5p  | 192 | <u>ACCAGGAUGGCCGAGUGGUUAAGGCGUUGGACUGGCCAGCUGUGAGUGUUUCU</u><br><u>UUGAGGUAGUAGGUUGUAUGGUUUGUGAGCAAUAGUAAGGAAAACUGUACACC</u><br><u>UGACUACCUUUCAGAAGUGCUGCACGUUGUUGGCCCGAUCCAAUGGACAUUAUGU</u><br><u>CCGCGUGGGUUCGAACCCCACUCCUGGUACCA</u>  | 62,096 |
| let-7d-5p  | 192 | <u>ACCAGGAUGGCCGAGUGGUUAAGGCGUUGGACUGGCCAGCUGUGAGUGUUUCU</u><br><u>UAGAGGUAGUAGGUUGCAUAGUUUGUGAGCAAUAGUAAGGAAAACUGUGCACC</u><br><u>UGACUACCUUUCAGAAGUGCUGCACGUUGUUGGCCCGAUCCAAUGGACAUUAUGU</u><br><u>CCGCGUGGGUUCGAACCCCACUCCUGGUACCA</u>  | 62,117 |
| let-7e-5p  | 192 | <u>ACCAGGAUGGCCGAGUGGUUAAGGCGUUGGACUGGCCAGCUGUGAGUGUUUCU</u><br><u>UUGAGGUAGGAGGUUGUAUAGUUUGUGAGCAAUAGUAAGGAAAACUGUACACC</u><br><u>UGCCUACCUUUCAGAAGUGCUGCACGUUGUUGGCCCGAUCCAAUGGACAUUAUGU</u><br><u>CCGCGUGGGUUCGAACCCCACUCCUGGUACCA</u>  | 62,095 |
| let-7f-5p  | 192 | <u>ACCAGGAUGGCCGAGUGGUUAAGGCGUUGGACUGGCCAGCUGUGAGUGUUUCU</u><br><u>UUGAGGUAGUAGAUUGUAUAGUUUGUGAGCAAUAGUAAGGAAAACUGUACAUC</u><br><u>UGACUACCUUUCAGAAGUGCUGCACGUUGUUGGCCCGAUCCAAUGGACAUUAUGU</u><br><u>CCGCGUGGGUUCGAACCCCACUCCUGGUACCA</u>  | 62,065 |
| let-7g-5p  | 192 | <u>ACCAGGAUGGCCGAGUGGUUAAGGCGUUGGACUGGCCAGCUGUGAGUGUUUCU</u><br><u>UUGAGGUAGUAGUUUGUACAGUUUGUGAGCAAUAGUAAGGAAAACUGUACAAC</u><br><u>UGACUACCUUUCAGAAGUGCUGCACGUUGUUGGCCCGAUCCAAUGGACAUUAUGU</u><br><u>CCGCGUGGGUUCGAACCCCACUCCUGGUACCA</u>  | 62,064 |
| miR-101-3p | 192 | <u>ACCAGGAUGGCCGAGUGGUUAAGGCGUUGGACUGGCCAGCUGUGAGUGUUUCU</u><br><u>UUACAGUACUGUGAUAAACUGAAUUGUGAGCAAUAGUAAGGAAGUUCAGUUACA</u><br><u>CUAGUGCUGUCUAGAAGUGCUGCACGUUGUUGGCCCGAUCCAAUGGACAUUAUG</u><br><u>UCCGCGUGGGUUCGAACCCCACUCCUGGUACCA</u> | 62,064 |
| miR-195-5p | 192 | <u>ACCAGGAUGGCCGAGUGGUUAAGGCGUUGGACUGGCCAGCUGUGAGUGUUUCU</u><br><u>UUAGCAGCACAGAAUAUUGGCUUGUGAGCAAUAGUAAGGAAGGCCAAUAUUC</u><br><u>UAGUGCUGCUCCAGAAGUGCUGCACGUUGUUGGCCCGAUCCAAUGGACAUUAUGU</u><br><u>CCGCGUGGGUUCGAACCCCACUCCUGGUACCA</u>   | 62,100 |
| miR-370-3p | 192 | <u>ACCAGGAUGGCCGAGUGGUUAAGGCGUUGGACUGGCCAGCUGUGAGUGUUUCU</u><br><u>UGCCUGCUGGGGUGGAACCGGUUGUGAGCAAUAGUAAGGAAGCCAGGUUCGC</u><br><u>CAUCAGCAGGAUAGAAGUGCUGCACGUUGUUGGCCCGAUCCAAUGGACAUUAUG</u><br><u>UCCGCGUGGGUUCGAACCCCACUCCUGGUACCA</u>   | 62,257 |

|             |     |                                                                                                                                                                                                                                         |        |
|-------------|-----|-----------------------------------------------------------------------------------------------------------------------------------------------------------------------------------------------------------------------------------------|--------|
| miR-495-3p  | 192 | <u>ACCAGGAUGGCCGAGUGGUUAAGGCGUUGGACUGGCCAGCUGUGAGUGUUUCU</u><br><u>UAAACAACAUGGUGCACUUCUUUGUGAGCAAUAGUAAGGAAGAGAAGUGCCC</u><br><u>ACUGUUUGUUCUAGAAGUGCUGCACGUUGUUGGCCCGAUCCAAUGGACAUAUG</u><br><u>UCCGCGUGGGUUCGAACCCACUCCUGGUACCA</u>  | 62,062 |
| miR-519a-5p | 192 | <u>ACCAGGAUGGCCGAGUGGUUAAGGCGUUGGACUGGCCAGCUGUGAGUGUUUCU</u><br><u>UCUCUAGAGGGAAGCGCUUCUGUGUGAGCAAUAGUAAGGAAUGGAAAGUGUU</u><br><u>CGCUUUUAGACUAGAAGUGCUGCACGUUGUUGGCCCGAUCCAAUGGACAUAUG</u><br><u>UCCGCGUGGGUUCGAACCCACUCCUGGUACCA</u>  | 62,151 |
| miR-29a-3p  | 192 | <u>ACCAGGAUGGCCGAGUGGUUAAGGCGUUGGACUGGCCAGCUGUGAGUGUUUCU</u><br><u>UUAGCACCAUCUGAAAUCGGUUAUGUGAGCAAUAGUAAGGAAUGACUGAUUCA</u><br><u>GCAUGGUGUUCUAGAAGUGCUGCACGUUGUUGGCCCGAUCCAAUGGACAUAUG</u><br><u>UCCGCGUGGGUUCGAACCCACUCCUGGUACCA</u> | 62,079 |
| miR-99a-5p  | 192 | <u>ACCAGGAUGGCCGAGUGGUUAAGGCGUUGGACUGGCCAGCUGUGAGUGUUUCU</u><br><u>UAACCCGUAGAUCCGAUCUUGUGUGUGAGCAAUAGUAAGGAAUACAAGGUCGA</u><br><u>UACUAUGGGUCUAGAAGUGCUGCACGUUGUUGGCCCGAUCCAAUGGACAUAUG</u><br><u>UCCGCGUGGGUUCGAACCCACUCCUGGUACCA</u> | 62,117 |
| miR-100-5p  | 192 | <u>ACCAGGAUGGCCGAGUGGUUAAGGCGUUGGACUGGCCAGCUGUGAGUGUUUCU</u><br><u>UAACCCGUAGAUCCGAACUUGUGUGUGAGCAAUAGUAAGGAAUACAAGUUCGA</u><br><u>UACUAUGGGUCUAGAAGUGCUGCACGUUGUUGGCCCGAUCCAAUGGACAUAUG</u><br><u>UCCGCGUGGGUUCGAACCCACUCCUGGUACCA</u> | 62,101 |
| miR-146a-5p | 194 | <u>ACCAGGAUGGCCGAGUGGUUAAGGCGUUGGACUGGCCAGCUGUGAGUGUUUCU</u><br><u>UUGAGAACUGAAUCCAUGGGUUUGUGAGCAAUAGUAAGGAAGACCGUGGGAU</u><br><u>UACAGUUCUUCUAGAAGUGCUGCACGUUGUUGGCCCGAUCCAAUGGACAUAUG</u><br><u>UCCGCGUGGGUUCGAACCCACUCCUGGUACCA</u>  | 62,096 |
| miR-146b-5p | 192 | <u>ACCAGGAUGGCCGAGUGGUUAAGGCGUUGGACUGGCCAGCUGUGAGUGUUUCU</u><br><u>UUGAGAACUGAAUCCAUAGGCUGUGAGCAAUAGUAAGGAUGGCCUGUGGGAU</u><br><u>UACAGUUCUCCUAGAAGUGCUGCACGUUGUUGGCCCGAUCCAAUGGACAUAUGU</u><br><u>CCGCGUGGGUUCGAACCCACUCCUGGUACCA</u>  | 62,110 |

BioRNA<sup>Gly</sup>

|             |     |                                                                                                                                                                                                                                      |        |
|-------------|-----|--------------------------------------------------------------------------------------------------------------------------------------------------------------------------------------------------------------------------------------|--------|
| miR-7-5p    | 180 | <u>GCAUGGGUGGUUCAGUGGUAGAAUUCUCGCCUGGCCAGCUGUGAGUGUUUCUU</u><br><u>UGGAAGACUAGUGAUUUUGUUGUGUGAGCAAUAGUAAGGAA</u> <u>CAACAAAUACU</u><br><u>CAGUCUUCCCUAGAAGUGCUGCACGUUGUUGGCCACGCGGGAGGCCCGGGUUC</u><br><u>GAUUCCCGGCCCAUGCACCA</u>   | 58,174 |
| miR-126b-3p | 180 | <u>GCAUGGGUGGUUCAGUGGUAGAAUUCUCGCCUGGCCAGCUGUGAGUGUUUCUU</u><br><u>UCGUACCGUGAGUAAUAAUGCGUGUGAGCAAUAGUAAGGAA</u> <u>UGCAUUAUUCUC</u><br><u>UAUGGUACGCUAGAAGUGCUGCACGUUGUUGGCCACGCGGGAGGCCCGGGUUC</u><br><u>GAUUCCCGGCCCAUGCACCA</u>  | 58,183 |
| miR-133a-3p | 180 | <u>GCAUGGGUGGUUCAGUGGUAGAAUUCUCGCCUGGCCAGCUGUGAGUGUUUCUU</u><br><u>UUUGGUCCCCUUAACCAGCUGUGUGAGCAAUAGUAAGGAAG</u> <u>CAGCUGGUUAA</u><br><u>GUGGGACCAACUAGAAGUGCUGCACGUUGUUGGCCACGCGGGAGGCCCGGGUUC</u><br><u>CGAUUCCCGGCCCAUGCACCA</u> | 58,540 |
| miR-200b-3p | 180 | <u>GCAUGGGUGGUUCAGUGGUAGAAUUCUCGCCUGGCCAGCUGUGAGUGUUUCUU</u><br><u>UAAUACUGCCUGGUAAUGAUGAUGUGAGCAAUAGUAAGGAA</u> <u>UCAUCAUUAUAG</u><br><u>UGCAGUAUUCUAGAAGUGCUGCACGUUGUUGGCCACGCGGGAGGCCCGGGUUC</u><br><u>GAUUCCCGGCCCAUGCACCA</u>  | 58,176 |
| miR-143b-3p | 180 | <u>GCAUGGGUGGUUCAGUGGUAGAAUUCUCGCCUGGCCAGCUGUGAGUGUUUCUU</u><br><u>UGAGAUGAAGCACUGUAGCUCUUGUGAGCAAUAGUAAGGAAG</u> <u>GAGCUGCAUGC</u><br><u>AUUCAUCUCUCAGAAGUGCUGCACGUUGUUGGCCACGCGGGAGGCCCGGGUUC</u><br><u>GAUUCCCGGCCCAUGCACCA</u>  | 58,220 |
| miR-206-3p  | 180 | <u>GCAUGGGUGGUUCAGUGGUAGAAUUCUCGCCUGGCCAGCUGUGAGUGUUUCUU</u><br><u>UGGAAUGUAAGGAAGUGUGUGUGUGUGAGCAAUAGUAAGGAA</u> <u>UCACACACUCCU</u><br><u>GUACAUUCCCUAGAAGUGCUGCACGUUGUUGGCCACGCGGGAGGCCCGGGUUC</u><br><u>GAUUCCCGGCCCAUGCACCA</u> | 58,244 |
| miR-375-3p  | 180 | <u>GCAUGGGUGGUUCAGUGGUAGAAUUCUCGCCUGGCCAGCUGUGAGUGUUUCUU</u><br><u>UUUGUUCGUUCGGCUCGCGUGAUGUGAGCAAUAGUAAGGAA</u> <u>UCGCGCGAGCGA</u><br><u>CACGAACAACUAGAAGUGCUGCACGUUGUUGGCCACGCGGGAGGCCCGGGUUC</u><br><u>GAUUCCCGGCCCAUGCACCA</u>  | 58,250 |
| miR-497-5p  | 180 | <u>GCAUGGGUGGUUCAGUGGUAGAAUUCUCGCCUGGCCAGCUGUGAGUGUUUCUU</u><br><u>CAGCAGCACACUGUGGUUUGUUUGUGAGCAAUAGUAAGGAAG</u> <u>GCAAACCAAGU</u><br><u>AGUGCUGUUAUAGAAGUGCUGCACGUUGUUGGCCACGCGGGAGGCCCGGGUUC</u><br><u>GAUUCCCGGCCCAUGCACCA</u>  | 58,284 |

|             |     |                                                                                                                                                                                                                                              |        |
|-------------|-----|----------------------------------------------------------------------------------------------------------------------------------------------------------------------------------------------------------------------------------------------|--------|
| miR-125b-5p | 180 | <u>GCAUGGGUGGUUCAGUGGUAGAAUUCUCGCCUGGCCAGCUGUGAGUGUUUCUU</u><br><u>UCCUGAGACCCUAACUUGUGA</u> UGUGAGCAAUAGUAAGGAAU <u>CACGGGUUGGG</u><br><u>CUCUUGGGGCU</u> AGAAGUGCUGCACGUUGUUGGCC <u>ACGCGGGAGGCCCGGGUUC</u><br><u>GAUCCCCGGCCAUGCACCA</u>  | 58,244 |
| let-7a-5p   | 180 | <u>GCAUGGGUGGUUCAGUGGUAGAAUUCUCGCCUGGCCAGCUGUGAGUGUUUCUU</u><br><u>UGAGGUAGUAGGUUGUAUAGUU</u> UGUGAGCAAUAGUAAGGAAA <u>ACUGUACACCU</u><br><u>GACUACCUUUC</u> AGAAGUGCUGCACGUUGUUGGCC <u>ACGCGGGAGGCCCGGGUUC</u><br><u>GAUCCCCGGCCAUGCACCA</u> | 58,207 |
| let-7b-5p   | 180 | <u>GCAUGGGUGGUUCAGUGGUAGAAUUCUCGCCUGGCCAGCUGUGAGUGUUUCUU</u><br><u>UGAGGUAGUAGGUUGUGUGGUU</u> UGUGAGCAAUAGUAAGGAAA <u>ACUGUACACCU</u><br><u>GACUACCUUUC</u> AGAAGUGCUGCACGUUGUUGGCC <u>ACGCGGGAGGCCCGGGUUC</u><br><u>GAUCCCCGGCCAUGCACCA</u> | 58,239 |
| let-7c-5p   | 180 | <u>GCAUGGGUGGUUCAGUGGUAGAAUUCUCGCCUGGCCAGCUGUGAGUGUUUCUU</u><br><u>UGAGGUAGUAGGUUGUGUGGUU</u> UGUGAGCAAUAGUAAGGAAA <u>ACUGUACACCU</u><br><u>GACUACCUUUC</u> AGAAGUGCUGCACGUUGUUGGCC <u>ACGCGGGAGGCCCGGGUUC</u><br><u>GAUCCCCGGCCAUGCACCA</u> | 58,239 |
| let-7d-5p   | 180 | <u>GCAUGGGUGGUUCAGUGGUAGAAUUCUCGCCUGGCCAGCUGUGAGUGUUUCUU</u><br><u>AGAGGUAGUAGGUUGCAUAGUU</u> UGUGAGCAAUAGUAAGGAAA <u>ACUGUGCACCU</u><br><u>GACUACCUUCC</u> AGAAGUGCUGCACGUUGUUGGCC <u>ACGCGGGAGGCCCGGGUUC</u><br><u>GAUCCCCGGCCAUGCACCA</u> | 58,244 |
| let-7e-5p   | 180 | <u>GCAUGGGUGGUUCAGUGGUAGAAUUCUCGCCUGGCCAGCUGUGAGUGUUUCUU</u><br><u>UGAGGUAGGAGGUUGUAUAGUU</u> UGUGAGCAAUAGUAAGGAAA <u>ACUGUACACCU</u><br><u>GCCUACCUUUC</u> AGAAGUGCUGCACGUUGUUGGCC <u>ACGCGGGAGGCCCGGGUUC</u><br><u>GAUCCCCGGCCAUGCACCA</u> | 58,222 |
| let-7f-5p   | 180 | <u>GCAUGGGUGGUUCAGUGGUAGAAUUCUCGCCUGGCCAGCUGUGAGUGUUUCUU</u><br><u>UGAGGUAGUAGAUUGUAUAGUU</u> UGUGAGCAAUAGUAAGGAAA <u>ACUGUACAUCU</u><br><u>GACUACCUUUC</u> AGAAGUGCUGCACGUUGUUGGCC <u>ACGCGGGAGGCCCGGGUUC</u><br><u>GAUCCCCGGCCAUGCACCA</u> | 58,19  |
| let-7g-5p   | 180 | <u>GCAUGGGUGGUUCAGUGGUAGAAUUCUCGCCUGGCCAGCUGUGAGUGUUUCUU</u><br><u>UGAGGUAGUAGUUUGUACAGUU</u> UGUGAGCAAUAGUAAGGAAA <u>ACUGUACAACU</u><br><u>GACUACCUUUC</u> AGAAGUGCUGCACGUUGUUGGCC <u>ACGCGGGAGGCCCGGGUUC</u><br><u>GAUCCCCGGCCAUGCACCA</u> | 58,191 |

|             |     |                                                                                                                                                                                                       |        |
|-------------|-----|-------------------------------------------------------------------------------------------------------------------------------------------------------------------------------------------------------|--------|
| miR-370-3p  | 180 | <u>GCAUGGGUGGUUCAGUGGUAGAAUUCUCGCCUGGCCAGCUGUGAGUGUUUCUU</u><br>GCCUGCUGGGGUGGAACCUUGUUGUGAGCAAUAGUAAGGAAGCCAGGUUCGCC<br>AUCAGCAGGAUAGAAGUGCUGCACGUUGUUGGCCACGCGGGAGGCCCGGGUUC<br>GAUCCCCGGCCAUGCACCA | 58,384 |
| miR-495-3p  | 180 | <u>GCAUGGGUGGUUCAGUGGUAGAAUUCUCGCCUGGCCAGCUGUGAGUGUUUCUU</u><br>AAACAACAUGGUGCACUUCUUGUGAGCAAUAGUAAGGAAGAGAAGUGCCCA<br>CUGUUUGUUCUAGAAGUGCUGCACGUUGUUGGCCACGCGGGAGGCCCGGGUUC<br>GAUCCCCGGCCAUGCACCA   | 58,189 |
| miR-519a-5p | 180 | <u>GCAUGGGUGGUUCAGUGGUAGAAUUCUCGCCUGGCCAGCUGUGAGUGUUUCUU</u><br>CUCUAGAGGGAAGCGCUUCUGUGUGAGCAAUAGUAAGGAUUGGAAAGUGUUC<br>GCUUUUAGACUAGAAGUGCUGCACGUUGUUGGCCACGCGGGAGGCCCGGGUUC<br>GAUCCCCGGCCAUGCACCA  | 58,278 |
| miR-29a-3p  | 180 | <u>GCAUGGGUGGUUCAGUGGUAGAAUUCUCGCCUGGCCAGCUGUGAGUGUUUCUU</u><br>UAGCACCAUCUGAAAUCGGUUAUGUGAGCAAUAGUAAGGAUUGACUGAUUCAG<br>CAUGGUGUUCUAGAAGUGCUGCACGUUGUUGGCCACGCGGGAGGCCCGGGUUC<br>GAUCCCCGGCCAUGCACCA | 58,206 |
| miR-101-3p  | 180 | <u>GCAUGGGUGGUUCAGUGGUAGAAUUCUCGCCUGGCCAGCUGUGAGUGUUUCUU</u><br>UACAGUACUGUGAUACUGAAUUGUGAGCAAUAGUAAGGAAGUUCAGUACAC<br>UAGUGCUGUCUAGAAGUGCUGCACGUUGUUGGCCACGCGGGAGGCCCGGGUUC<br>GAUCCCCGGCCAUGCACCA   | 58,191 |
| miR-195-5p  | 180 | <u>GCAUGGGUGGUUCAGUGGUAGAAUUCUCGCCUGGCCAGCUGUGAGUGUUUCUU</u><br>UAGCAGCACAGAAUAUUGGCUUGUGAGCAAUAGUAAGGAAGGCCAAUAUUCU<br>AGUGCUGCUCCAGAAGUGCUGCACGUUGUUGGCCACGCGGGAGGCCCGGGUUC<br>GAUCCCCGGCCAUGCACCA  | 58,227 |
| miR-99-5p   | 180 | <u>GCAUGGGUGGUUCAGUGGUAGAAUUCUCGCCUGGCCAGCUGUGAGUGUUUCUU</u><br>AACCCGUAGAUCCGAUCUUGUGUGAGCAAUAGUAAGGAUAACAAGGUCGAU<br>ACUAUGGGUCUAGAAGUGCUGCACGUUGUUGGCCACGCGGGAGGCCCGGGUUC<br>GAUCCCCGGCCAUGCACCA   | 58,244 |
| miR-100-5p  | 180 | <u>GCAUGGGUGGUUCAGUGGUAGAAUUCUCGCCUGGCCAGCUGUGAGUGUUUCUU</u><br>AACCCGUAGAUCCGAACUUGUGUGAGCAAUAGUAAGGAUAACAAGUUCGAU<br>ACUAUGGGUCUAGAAGUGCUGCACGUUGUUGGCCACGCGGGAGGCCCGGGUUC<br>GAUCCCCGGCCAUGCACCA   | 58,228 |

|             |     |                                                                                                                                                                                                                              |        |
|-------------|-----|------------------------------------------------------------------------------------------------------------------------------------------------------------------------------------------------------------------------------|--------|
| miR-146a-5p | 180 | <u>GCAUGGGUGGUUCAGUGGUAGAAUUCUCGCCUGGCCAGCUGUGAGUGUUUCUU</u><br><u>UGAGAACUGAAUCCAUAGGGUUUGUGAGCAAUAGUAAGGAAGACCUUGUGGAUU</u><br><u>ACAGUUCUUCUAGAAGUGCUGCACGUUGUUGGCCACGCGGGAGGCCCGGGUUC</u><br><u>GAUUCCCGGCCCAUGCACCA</u> | 58,223 |
| miR-146b-5p | 180 | <u>GCAUGGGUGGUUCAGUGGUAGAAUUCUCGCCUGGCCAGCUGUGAGUGUUUCUU</u><br><u>UGAGAACUGAAUCCAUAGGCUGUGUGAGCAAUAGUAAGGAUGGCCUGUGGAUU</u><br><u>ACAGUUCUUCUAGAAGUGCUGCACGUUGUUGGCCACGCGGGAGGCCCGGGUUC</u><br><u>GAUUCCCGGCCCAUGCACCA</u>  | 58,237 |

**Supplemental Table S2.** Primers used for the construction of RNA expression plasmids in this study. Black, BioRNA; Orange, *EcoRI* restriction site overhang; Blue, *PstI* restriction site overhang; F, forward primer; R, reverse primer.

| BioRNA                      | Cloning Primers (5' to 3')                                                                                                                                                                                                                                                           |
|-----------------------------|--------------------------------------------------------------------------------------------------------------------------------------------------------------------------------------------------------------------------------------------------------------------------------------|
| <b>BioRNA<sup>Leu</sup></b> |                                                                                                                                                                                                                                                                                      |
| miR-143b-3p                 | F <b>TTGTAACGCTGAATTC</b> ACCAGGATGGCCGAGTGGTTAAGGCGTTGGACTGGCCAGCTGTGAGTGTTTCTTTGAG<br>ATGAAGCACTGTAGCTCTTGTGAGCAATAGTAAGGAAGGAGCTGCATGC<br>R <b>CTTTCGCTAAGGATCTGCAGT</b> GGTACCAGGAGTGGGGTTCGAACCCACGCGGACATATGTCCATTGGATCGGGC<br>CAACAACGTGCAGCACTTCTGAGAGATGAATGCATGCAGCTCCTTCC |
| miR-206-3p                  | F <b>TTGTAACGCTGAATTC</b> ACCAGGATGGCCGAGTGGTTAAGGCGTTGGACTGGCCAGCTGTGAGTGTTTCTTTGGA<br>ATGTAAGGAAGTGTGTGGTGTGAGCAATAGTAAGGAATCACACTCC<br>R <b>CTTTCGCTAAGGATCTGCAGT</b> GGTACCAGGAGTGGGGTTCGAACCCACGCGGACATATGTCCATTGGATCGGGC<br>CAACAACGTGCAGCACTTCTAGGGAATGTACAGGAGTGTGTGATTCC    |
| miR-375-3p                  | F <b>TTGTAACGCTGAATTC</b> ACCAGGATGGCCGAGTGGTTAAGGCGTTGGACTGGCCAGCTGTGAGTGTTTCTTTTGT<br>TCGTTCGGCTCGCGTGATGTGAGCAATAGTAAGGAATCGCGCGAGCG<br>R <b>CTTTCGCTAAGGATCTGCAGT</b> GGTACCAGGAGTGGGGTTCGAACCCACGCGGACATATGTCCATTGGATCGGGC<br>CAACAACGTGCAGCACTTCTAGTTGTTTCGTGTCGCTCGCGGATTCC   |
| miR-497-5p                  | F <b>TTGTAACGCTGAATTC</b> ACCAGGATGGCCGAGTGGTTAAGGCGTTGGACTGGCCAGCTGTGAGTGTTTCTTCAGC<br>AGCACACTGTGGTTTTGTTTGTGAGCAATAGTAAGGAAGGCAAACCAAG<br>R <b>CTTTCGCTAAGGATCTGCAGT</b> GGTACCAGGAGTGGGGTTCGAACCCACGCGGACATATGTCCATTGGATCGGGC<br>CAACAACGTGCAGCACTTCTATAACAGCACTACTTGGTTTGCCTTC  |
| miR-125b-5p                 | F <b>TTGTAACGCTGAATTC</b> ACCAGGATGGCCGAGTGGTTAAGGCGTTGGACTGGCCAGCTGTGAGTGTTTCTTTCCCT<br>GAGACCCTAACTTGTGATGTGAGCAATAGTAAGGAATCACGGGTTGG<br>R <b>CTTTCGCTAAGGATCTGCAGT</b> GGTACCAGGAGTGGGGTTCGAACCCACGCGGACATATGTCCATTGGATCGGGC<br>CAACAACGTGCAGCACTTCTAGCCCCAAGAGCCCCAACCCGTGATTCC |
| let-7a-5p                   | F <b>TTGTAACGCTGAATTC</b> ACCAGGATGGCCGAGTGGTTAAGGCGTTGGACTGGCCAGCTGTGAGTGTTTCTTTGAG<br>GTAGTAGGTTGTATAGTTTGTGAGCAATAGTAAGGAAAACCTGTACAC<br>R <b>CTTTCGCTAAGGATCTGCAGT</b> GGTACCAGGAGTGGGGTTCGAACCCACGCGGACATATGTCCATTGGATCGGG<br>CCAACAACGTGCAGCACTTCTGAAAGGTAGTCAGGTGTACAGTTTTTCT |
| let-7b-5p                   | F <b>TTGTAACGCTGAATTC</b> ACCAGGATGGCCGAGTGGTTAAGGCGTTGGACTGGCCAGCTGTGAGTGTTTCTTTGAG<br>GTAGTAGGTTGTGTGGTTTGTGAGCAATAGTAAGGAAAACCTGTACAC<br>R <b>CTTTCGCTAAGGATCTGCAGT</b> GGTACCAGGAGTGGGGTTCGAACCCACGCGGACATATGTCCATTGGATCGGG<br>CCAACAACGTGCAGCACTTCTGAAAGGTAGTCAGGTGTACAGTTTTTCT |
| let-7c-5p                   | F <b>TTGTAACGCTGAATTC</b> ACCAGGATGGCCGAGTGGTTAAGGCGTTGGACTGGCCAGCTGTGAGTGTTTCTTTGAGG<br>TAGTAGGTTGTATGGTTTGTGAGCAATAGTAAGGAAAACCTGTACA                                                                                                                                              |

|             |   |                                                                                                                                 |
|-------------|---|---------------------------------------------------------------------------------------------------------------------------------|
|             | R | CTTTCGCTAAGGATCTGCAGTGGTACCAGGAGTGGGGTTCGAACCCACGCGGACATATGTCCATTGGATCGGGC<br>CAACAACGTGCAGCACTTCTGAAAGGTAGTcAGGTGTACAGTTTTCTTA |
| let-7d-5p   | F | TTGTAACGCTGAATTCACCAGGATGGCCGAGTGGTTAAGGCGTTGGACTGGCCAGCTGTGAGTGTTTCTTAGAG<br>GTAGTAGGTTGCATAGTTTGTGAGCAATAGTAAGGAAAACCTGTGCAC  |
|             | R | CTTTCGCTAAGGATCTGCAGGTGGTACCAGGAGTGGGGTTCGAACCCACGCGGACATATGTCCATTGGATCGGG<br>CCAACAACGTGCAGCACTTCTGGAAGGTAGTCAGGTGCACAGTTTTCT  |
| let-7e-5p   | F | TTGTAACGCTGAATTCACCAGGATGGCCGAGTGGTTAAGGCGTTGGACTGGCCAGCTGTGAGTGTTTCTTTGAG<br>GTAGGAGGTTGTATAGTTTGTGAGCAATAGTAAGGAAAACCTGTACAC  |
|             | R | CTTTCGCTAAGGATCTGCAGGTGGTACCAGGAGTGGGGTTCGAACCCACGCGGACATATGTCCATTGGATCGGG<br>CCAACAACGTGCAGCACTTCTGAAAGGTAGGCAGGTGTACAGTTTTCT  |
| let-7f-5p   | F | TTGTAACGCTGAATTCACCAGGATGGCCGAGTGGTTAAGGCGTTGGACTGGCCAGCTGTGAGTGTTTCTTTGAG<br>GTAGTAGATTGTATAGTTTGTGAGCAATAGTAAGGAAAACCTGTACAT  |
|             | R | CTTTCGCTAAGGATCTGCAGGTGGTACCAGGAGTGGGGTTCGAACCCACGCGGACATATGTCCATTGGATCGGG<br>CCAACAACGTGCAGCACTTCTGAAAGGTAGTCAGATGTACAGTTTTCT  |
| let-7g-5p   | F | TTGTAACGCTGAATTCACCAGGATGGCCGAGTGGTTAAGGCGTTGGACTGGCCAGCTGTGAGTGTTTCTTTGAG<br>GTAGTAGTTTGTACAGTTTGTGAGCAATAGTAAGGAAAACCTGTACA   |
|             | R | CTTTCGCTAAGGATCTGCAGTGGTACCAGGAGTGGGGTTCGAACCCACGCGGACATATGTCCATTGGATCGGGC<br>CAACAACGTGCAGCACTTCTGAAAGGTAGTCAGTTGTACAGTTTTCTT  |
| miR-370-3p  | F | TTGTAACGCTGAATTCACCAGGATGGCCGAGTGGTTAAGGCGTTGGACTGGCCAGCTGTGAGTGTTTCTTTACAG<br>TACTGTGATAACTGAATTGTGAGCAATAGTAAGGAAGTTCAGTTACAC |
|             | R | CTTTCGCTAAGGATCTGCAGTGGTACCAGGAGTGGGGTTCGAACCCACGCGGACATATGTCCATTGGATCGGGC<br>CAACAACGTGCAGCACTTCTAGACAGCACTAGTGTAACTGAACTTC    |
| miR-495-3p  | F | TTGTAACGCTGAATTCACCAGGATGGCCGAGTGGTTAAGGCGTTGGACTGGCCAGCTGTGAGTGTTTCTTTAGCA<br>GCACAGAAATATTGGCTTGTGAGCAATAGTAAGGAAGGCCAATATTCT |
|             | R | CTTTCGCTAAGGATCTGCAGTGGTACCAGGAGTGGGGTTCGAACCCACGCGGACATATGTCCATTGGATCGGGC<br>CAACAACGTGCAGCACTTCTGGAGCAGCACTAGAATATTGGCCTTC    |
| miR-519a-5p | F | TTGTAACGCTGAATTCACCAGGATGGCCGAGTGGTTAAGGCGTTGGACTGGCCAGCTGTGAGTGTTTCTTGCTG<br>CTGGGGTGGAAACCTGGTTGTGAGCAATAGTAAGGAAGCCAGGTTTCG  |
|             | R | CTTTCGCTAAGGATCTGCAGTGGTACCAGGAGTGGGGTTCGAACCCACGCGGACATATGTCCATTGGATCGGGC<br>CAACAACGTGCAGCACTTCTATCCTGCTGATGGCGAACCTGGCTTCC   |
| miR-29a-3p  | F | TTGTAACGCTGAATTCACCAGGATGGCCGAGTGGTTAAGGCGTTGGACTGGCCAGCTGTGAGTGTTTCTTAAAC<br>AAACATGGTGCACCTTCTTTGTGAGCAATAGTAAGGAAGAGAAGTGCCC |
|             | R | CTTTCGCTAAGGATCTGCAGTGGTACCAGGAGTGGGGTTCGAACCCACGCGGACATATGTCCATTGGATCGGGC<br>CAACAACGTGCAGCACTTCTAGAACAACAGTGGGCACTTCTCTTCC    |
| miR-101-3p  | F | TTGTAACGCTGAATTCACCAGGATGGCCGAGTGGTTAAGGCGTTGGACTGGCCAGCTGTGAGTGTTTCTTCTCTA<br>GAGGGAAGCGCTTCTGTGTGAGCAATAGTAAGGAATGGAAAGTGTT   |

|                             |   |                                                                                                                                  |
|-----------------------------|---|----------------------------------------------------------------------------------------------------------------------------------|
|                             | R | CTTTCGCTAAGGATCTGCAGTGGTACCAGGAGTGGGGTTCGAACCCACGCGGACATATGTCCATTGGATCGGGC<br>CAACAACGTGCAGCACTTCTAGTCTAAAAGCGAACACTTTCCATTCC    |
| miR-195-5p                  | F | TTGTAACGCTGAATTCACCAGGATGGCCGAGTGGTTAAGGCGTTGGACTGGCCAGCTGTGAGTGTTTCTTTAGCA<br>CCATCTGAAATCGGTTATGTGAGCAATAGTAAGGAATGACTGATTC    |
|                             | R | CTTTCGCTAAGGATCTGCAGTGGTACCAGGAGTGGGGTTCGAACCCACGCGGACATATGTCCATTGGATCGGGC<br>CAACAACGTGCAGCACTTCTAGAACACCATGCTGAATCAGTCATTCCCT  |
| miR-99-5p                   | F | TTGTAACGCTGAATTCACCAGGATGGCCGAGTGGTTAAGGCGTTGGACTGGCCAGCTGTGAGTGTTTCTTAACCC<br>GTAGATCCGATCTTGTGTGTGAGCAATAGTAAGGAATACAAGGTCG    |
|                             | R | CTTTCGCTAAGGATCTGCAGTGGTACCAGGAGTGGGGTTCGAACCCACGCGGACATATGTCCATTGGATCGGGC<br>CAACAACGTGCAGCACTTCTAGACCCATAGTATCGACCTTGTATTCCCT  |
| miR-100-5p                  | F | TTGTAACGCTGAATTCACCAGGATGGCCGAGTGGTTAAGGCGTTGGACTGGCCAGCTGTGAGTGTTTCTTAACCC<br>GTAGATCCGAACTTGTGTGTGAGCAATAGTAAGGAATACAAGTTTCG   |
|                             | R | CTTTCGCTAAGGATCTGCAGTGGTACCAGGAGTGGGGTTCGAACCCACGCGGACATATGTCCATTGGATCGGGC<br>CAACAACGTGCAGCACTTCTAGACCCATAGTATCGAACTTGTATTCCCT  |
| miR-146a-5p                 | F | TTGTAACGCTGAATTCACCAGGATGGCCGAGTGGTTAAGGCGTTGGACTGGCCAGCTGTGAGTGTTTCTTTGAG<br>AACTGAATTCCATGGGTTTGTGAGCAATAGTAAGGAAGACCTGTGGA    |
|                             | R | CTTTCGCTAAGGATCTGCAGTGGTACCAGGAGTGGGGTTCGAACCCACGCGGACATATGTCCATTGGATCGGGC<br>CAACAACGTGCAGCACTTCTAGAAGAAGTGTAAATCCACAGGTCTTCCCT |
| miR-146b-5p                 | F | TTGTAACGCTGAATTCACCAGGATGGCCGAGTGGTTAAGGCGTTGGACTGGCCAGCTGTGAGTGTTTCTTTGAG<br>AACTGAATTCCATAGGCTGGTGTGAGCAATAGTAAGGATGGCCTGTGGA  |
|                             | R | CTTTCGCTAAGGATCTGCAGTGGTACCAGGAGTGGGGTTCGAACCCACGCGGACATATGTCCATTGGATCGGGC<br>CAACAACGTGCAGCACTTCTAGGAGAAGTGTAAATCCACAGGCCATCCT  |
| <b>BioRNA<sup>Gly</sup></b> |   |                                                                                                                                  |
| miR-126b-3p                 | F | TTGTAACGCTGAATTCGCATGGGTGGTTCAGTGGTAGAATTCTCGCCTGGCCAGCTGTGAGTG                                                                  |
|                             | R | CTTTCGCTAAGGATCTGCAGTGGTGCATGGGCCGGGAATCGAACCCGGGCCTCCCGCGTGGGCCAACAAACGTGC                                                      |
| miR-133a-3p                 | F | TTGTAACGCTGAATTCGCATGGGTGGTTCAGTGGTAGAATTCTCGCCTGGCCAGCTGTGAGTG                                                                  |
|                             | R | CTTTCGCTAAGGATCTGCAGTGGTGCATGGGCCGGGAATCGAACCCGGGCCTCCCGCGTGGGCCAACAAACGTGC                                                      |
| miR-200b-3p                 | F | TTGTAACGCTGAATTCGCATGGGTGGTTCAGTGGTAGAATTCTCGCCTGGCCAGCTGTGAGTG                                                                  |
|                             | R | CTTTCGCTAAGGATCTGCAGTGGTGCATGGGCCGGGAATCGAACCCGGGCCTCCCGCGTGGGCCAACAAACGTGC                                                      |
| miR-7-5p                    | F | TTGTAACGCTGAATTCGCATGGGTGGTTCAGTGGTAGAATTCTCGCCTGGCCAGCTGTGAGTG                                                                  |
|                             | R | CTTTCGCTAAGGATCTGCAGTGGTGCATGGGCCGGGAATCGAACCCGGGCCTCCCGCGTGGGCCAACAAACGTGC                                                      |

|             |   |                                                                                                                            |
|-------------|---|----------------------------------------------------------------------------------------------------------------------------|
| miR-143b-3p | F | TTGTAACGCTGAATTCGCATGGGTGGTTCAGTGGTAGAATTCTCGCCTGGCCAGCTGTGAGTG                                                            |
|             | R | CTTTCGCTAAGGATCTGCAGTGGTGCATGGGCCGGGAATCGAACCCGGGCCTCCCGCGTGGGCCAACAAACGTGC                                                |
| miR-206-3p  | F | TTGTAACGCTGAATTCGCATGGGTGGTTCAGTGGTAGAATTCTCGCCTGGCCAGCTGTGAGTG                                                            |
|             | R | CTTTCGCTAAGGATCTGCAGTGGTGCATGGGCCGGGAATCGAACCCGGGCCTCCCGCGTGGGCCAACAAACGTGC                                                |
| miR-375-3p  | F | TTGTAACGCTGAATTCGCATGGGTGGTTCAGTGGTAGAATTCTCGCCTGGCCAGCTGTGAGTG                                                            |
|             | R | CTTTCGCTAAGGATCTGCAGTGGTGCATGGGCCGGGAATCGAACCCGGGCCTCCCGCGTGGGCCAACAAACGTGC                                                |
| miR-497-5p  | F | TTGTAACGCTGAATTCGCATGGGTGGTTCAGTGGTAGAATTCTCGCCTGGCCAGCTGTGAGTG                                                            |
|             | R | CTTTCGCTAAGGATCTGCAGTGGTGCATGGGCCGGGAATCGAACCCGGGCCTCCCGCGTGGGCCAACAAACGTGC                                                |
| miR-125b-5p | F | TTGTAACGCTGAATTCGCATGGGTGGTTCAGTGGTAGAATTCTCGCCTGGCCAGCTGTGAGTG                                                            |
|             | R | CTTTCGCTAAGGATCTGCAGTGGTGCATGGGCCGGGAATCGAACCCGGGCCTCCCGCGTGGGCCAACAAACGTGC                                                |
| let-7a-5p   | F | TTGTAACGCTGAATTCGCATGGGTGGTTCAGTGGTAGAATTCTCGCCTGGCCAGCTGTGAGTG                                                            |
|             | R | CTTTCGCTAAGGATCTGCAGTGGTGCATGGGCCGGGAATCGAACCCGGGCCTCCCGCGTGGGCCAACAAACGTGC                                                |
| let-7b-5p   | F | TTGTAACGCTGAATTCGCATGGGTGGTTCAGTGGTAGAATTCTCGCCTGGCCAGCTGTGAGTG                                                            |
|             | R | CTTTCGCTAAGGATCTGCAGTGGTGCATGGGCCGGGAATCGAACCCGGGCCTCCCGCGTGGGCCAACAAACGTGC                                                |
| let-7c-5p   | F | TTGTAACGCTGAATTCGCA TGGGTGGTTCAGTGGTAGAATTCTCGCCTGGCCAGCTGTGAGTGTTTCTTTGAGGT<br>AGTAGGTTGTATGGTTTGTGAGCAATAGTAAGGAAAACGTGA |
|             | R | CTTTCGCTAAGGATCTGCAGTGGTGCATGGGCCGGGAATCGAACCCGGGCCTCCCGCGTGGGCCAACAAACGTGC<br>AGCACTTCTGAAAGGTAGTCAGGTGTACAGTTTTCTTA      |
| let-7d-5p   | F | TTGTAACGCTGAATTCGCATGGGTGGTTCAGTGGTAGAATTCTCGCCTGGCCAGCTGTGAGTG                                                            |
|             | R | CTTTCGCTAAGGATCTGCAGTGGTGCATGGGCCGGGAATCGAACCCGGGCCTCCCGCGTGGGCCAACAAACGTGC                                                |
| let-7e-5p   | F | TTGTAACGCTGAATTCGCATGGGTGGTTCAGTGGTAGAATTCTCGCCTGGCCAGCTGTGAGTG                                                            |
|             | R | CTTTCGCTAAGGATCTGCAGTGGTGCATGGGCCGGGAATCGAACCCGGGCCTCCCGCGTGGGCCAACAAACGTGC                                                |
| let-7f-5p   | F | TTGTAACGCTGAATTCGCATGGGTGGTTCAGTGGTAGAATTCTCGCCTGGCCAGCTGTGAGTG                                                            |
|             | R | CTTTCGCTAAGGATCTGCAGTGGTGCATGGGCCGGGAATCGAACCCGGGCCTCCCGCGTGGGCCAACAAACGTGC                                                |
| let-7g-5p   | F | TTGTAACGCTGAATTCGCATGGGTGGTTCAGTGGTAGAATTCTCGCCTGGCCAGCTGTGAGTG                                                            |
|             | R | CTTTCGCTAAGGATCTGCAGTGGTGCATGGGCCGGGAATCGAACCCGGGCCTCCCGCGTGGGCCAACAAACGTGC                                                |

|             |   |                                                                             |
|-------------|---|-----------------------------------------------------------------------------|
| miR-370-3p  | F | TTGTAACGCTGAATTCGCATGGGTGGTTCAGTGGTAGAATTCTCGCCTGGCCAGCTGTGAGTG             |
|             | R | CTTTCGCTAAGGATCTGCAGTGGTGCATGGGCCGGGAATCGAACCCGGGCCTCCCGCGTGGGCCAACAAACGTGC |
| miR-495-3p  | F | TTGTAACGCTGAATTCGCATGGGTGGTTCAGTGGTAGAATTCTCGCCTGGCCAGCTGTGAGTG             |
|             | R | CTTTCGCTAAGGATCTGCAGTGGTGCATGGGCCGGGAATCGAACCCGGGCCTCCCGCGTGGGCCAACAAACGTGC |
| miR-519a-5p | F | TTGTAACGCTGAATTCGCATGGGTGGTTCAGTGGTAGAATTCTCGCCTGGCCAGCTGTGAGTG             |
|             | R | CTTTCGCTAAGGATCTGCAGTGGTGCATGGGCCGGGAATCGAACCCGGGCCTCCCGCGTGGGCCAACAAACGTGC |
| miR-29a-3p  | F | TTGTAACGCTGAATTCGCATGGGTGGTTCAGTGGTAGAATTCTCGCCTGGCCAGCTGTGAGTG             |
|             | R | CTTTCGCTAAGGATCTGCAGTGGTGCATGGGCCGGGAATCGAACCCGGGCCTCCCGCGTGGGCCAACAAACGTGC |
| miR-101-3p  | F | TTGTAACGCTGAATTCGCATGGGTGGTTCAGTGGTAGAATTCTCGCCTGGCCAGCTGTGAGTG             |
|             | R | CTTTCGCTAAGGATCTGCAGTGGTGCATGGGCCGGGAATCGAACCCGGGCCTCCCGCGTGGGCCAACAAACGTGC |
| miR-195-5p  | F | TTGTAACGCTGAATTCGCATGGGTGGTTCAGTGGTAGAATTCTCGCCTGGCCAGCTGTGAGTG             |
|             | R | CTTTCGCTAAGGATCTGCAGTGGTGCATGGGCCGGGAATCGAACCCGGGCCTCCCGCGTGGGCCAACAAACGTGC |
| miR-99-5p   | F | TTGTAACGCTGAATTCGCATGGGTGGTTCAGTGGTAGAATTCTCGCCTGGCCAGCTGTGAGTG             |
|             | R | CTTTCGCTAAGGATCTGCAGTGGTGCATGGGCCGGGAATCGAACCCGGGCCTCCCGCGTGGGCCAACAAACGTGC |
| miR-100-5p  | F | TTGTAACGCTGAATTCGCATGGGTGGTTCAGTGGTAGAATTCTCGCCTGGCCAGCTGTGAGTG             |
|             | R | CTTTCGCTAAGGATCTGCAGTGGTGCATGGGCCGGGAATCGAACCCGGGCCTCCCGCGTGGGCCAACAAACGTGC |
| miR-146a-5p | F | TTGTAACGCTGAATTCGCATGGGTGGTTCAGTGGTAGAATTCTCGCCTGGCCAGCTGTGAGTG             |
|             | R | CTTTCGCTAAGGATCTGCAGTGGTGCATGGGCCGGGAATCGAACCCGGGCCTCCCGCGTGGGCCAACAAACGTGC |
| miR-146b-5p | F | TTGTAACGCTGAATTCGCATGGGTGGTTCAGTGGTAGAATTCTCGCCTGGCCAGCTGTGAGTG             |
|             | R | CTTTCGCTAAGGATCTGCAGTGGTGCATGGGCCGGGAATCGAACCCGGGCCTCCCGCGTGGGCCAACAAACGTGC |

**Supplemental Table S3.** Sequences of commercial mimics and primers used for real-time qPCR analyses. F, forward primer; R, reverse primer.

| <b>Mimic miRNA</b>                                 | <b>Sequence (5' to 3')</b>                             |
|----------------------------------------------------|--------------------------------------------------------|
| miRCURY LNA<br>miR-7-5p<br>(Mimic miR-7-5p)        | UGGAAGACUAGUGAUUUUGUUGU (guide sequence)               |
| miRCURY LNA<br>negative control<br>(Mimic Control) | UCACCGGGUGUAAAUCAGCUUG (guide sequence)                |
| <b>Primer</b>                                      | <b>Primer Sequence (5' to 3')</b>                      |
| hsa-miR-7-5p                                       |                                                        |
| stem-loop RT                                       | GTCGTATCCAGTGCAGGGTCCGAGGTATTCGCACTGGATACGACCAA<br>CAA |
| qPCR                                               | F CGCGCTGGAAGACTAGTGATT<br>R GTGCAGGGTCCGAGGT          |
| U6 qPCR                                            | F CTCGCTTCGGCAGCACA<br>R AACGCTTCACGAATTTGCGT          |

**Supplemental Table S4.** RNA sequences used for computational modeling. Underlined, htRNA; Black, respective hsa-pre-miRNA sequence; Red and Green, miRNA guide and passenger strand, respectively; Orange, anticodon; Bold, “CCA” tail. Sequences attained from the Genomic tRNA Database (GtRNAdb), *miRBase.org*, or our recent publications.

| Target ncRNA                         | Length (nt) | Sequence (5' to 3')                                                                                                                                                                                                                                 | MW (Da) |
|--------------------------------------|-------------|-----------------------------------------------------------------------------------------------------------------------------------------------------------------------------------------------------------------------------------------------------|---------|
| htRNA <sup>Gly</sup> (anticodon GCC) | 74          | <u>GCAUGGGUGGUUCAGUGGUAGAAUUCUCGCCUGCCACGCGGGAGGC</u><br><u>CCGGGUUCGAUCCCCGGCCCAUGCACCA</u>                                                                                                                                                        | 24,022  |
| htRNA <sup>Leu</sup> (anticodon UAA) | 86          | <u>ACCAGGAUGGCCGAGUGGUUAAGGCGUUGGACUUAAGAUCCAAUGG</u><br><u>ACAUAUGUCCGCGUGGGUUCGAACCCACUCCUGGUACCA</u>                                                                                                                                             | 27,905  |
| hsa-pre-miR-34a-5p                   | 114         | GGCCGGGCCAGCUGUGAGUGUUUCUUUGGCAGUGUCUUAGCUGGUU<br>GUUGUGAGCAAUAGUAAGGAAGCAAUCAGCAAGUAUACUGCCCUAG<br>AAGUGCUGCACGUUGUUGGCC                                                                                                                           | 36,975  |
| hsa-pre-miR-124-3p                   | 85          | AGGCCUCUCUCUCGUGUUCACAGCGGACCUUGAUUUAAAUGUCCA<br>UACAAUUAAGGCACGCGGUGAAUGCCAA GAAUGGGGCUG                                                                                                                                                           | 27,505  |
| hsa-pre-miR-7-5p                     | 110         | UUGGAUGUUGGCCUAGUUCUGUGUGGAAGACUAGUGAUUUUGUUG<br>UUUUUAGAUAAACUAAAUCGACAACAAAUCACAGUCUGCCAU AUGGC<br>ACAGGCCAUGCCUCUACAG                                                                                                                            | 35,461  |
| hsa-pre-miR-34a/miR-124-3p           | 109         | GGCCAGCUGUGAGUGUUUCUUUAAGGCACGCGGUGAAUGCCGUUGU<br>GAGCAAUAGUAAGGAAGCGGUGUCCCGUCGUGCCUUCUAGAAGUG<br>CUGCACGUUGUUGGCC                                                                                                                                 | 35,351  |
| hsa-pre-miR-34a/miR-7-5p             | 109         | GGCCAGCUGUGAGUGUUUCUUUGGAAGACUAGUGAUUUUGUUGUGU<br>GAGCAAUAGUAAGGAACAACAAAACUCAGUCUCCCUAGAAGUG<br>CUGCACGUUGUUGGCC                                                                                                                                   | 35,266  |
| BioRNA <sup>Gly</sup> /miR-34a-5p    | 180         | <u>GCAUGGGUGGUUCAGUGGUAGAAUUCUCGCCUGGCCAGCUGUGAGU</u><br><u>GUUUCUUUGGCAGUGUCUAGCUGGUUGUUGUGAGCAAUAGUAAGG</u><br><u>AAGCAAUCAGCAAGUAUACUGCCCUAGAAGUGCUGCACGUUGUUGG</u><br><u>CCCACGCGGGAGGCCCGGUUCGAUCCCCGGCCCAUGCACCA</u>                          | 58,237  |
| BioRNA <sup>Leu</sup> /miR-34a-5p    | 192         | <u>ACCAGGAUGGCCGAGUGGUUAAGGCGUUGGACUGGCCAGCUGUGAG</u><br><u>UGUUUCUUUGGCAGUGUCUAGCUGGUUGUUGUGAGCAAUAGUAAG</u><br><u>GAAGCAAUCAGCAAGUAUACUGCCCUAGAAGUGCUGCACGUUGUUG</u><br><u>GCCC GAUCCA AUGGACAUAUGUCCGCGUGGGUUCGAACCCACUCC</u><br><u>UGGUACCA</u> | 62,110  |
| BioRNA <sup>Gly</sup> /miR-124-3p    | 180         | <u>GCAUGGGUGGUUCAGUGGUAGAAUUCUCGCCUGGCCAGCUGUGAGU</u><br><u>GUUUCUUUAAGGCACGCGGUGAAUGCCGUUGUGAGCAAUAGUAAGG</u>                                                                                                                                      | 58,259  |

|                                   |     |                                                                                                                                                                                                                                           |        |
|-----------------------------------|-----|-------------------------------------------------------------------------------------------------------------------------------------------------------------------------------------------------------------------------------------------|--------|
|                                   |     | AAGCGGUGU <u>UCCCGUCGUGCCUUCU</u> AGAAGUGCUGCACGUUGUUG<br>CCCACGCGGGAGGCCCGGGUUCGAU <u>UCCCGGCCAUGCACCA</u>                                                                                                                               |        |
| BioRNA <sup>Leu</sup> /miR-124-3p | 192 | ACCAGGAUGGCCGAGUGGUUAAGGCGUUGGACUGGCCAGCUGUGAG<br>UGUUUCUU <u>UAAGGCACGCGGUGAAUGCCGU</u> UGUGAGCAAUAGUAAG<br>GAAGCGGUGU <u>UCCCGUCGUGCCUUCU</u> AGAAGUGCUGCACGUUGUUG<br>GCCCGAUCCAAUGGACAUAUGUCCGCGUGGGUUCGAACCCACUCC<br>UGGUACCA         | 62,132 |
| BioRNA <sup>Gly</sup> /miR-7-5p   | 180 | GCAUGGGUGGUUCAGUGGUAGAAUUCUCGCCUGGCCAGCUGUGAGU<br>GUUUCUU <u>UGGAAGACUAGUGAUUUUGUUG</u> UGUGAGCAAUAGUAAG<br>GAA <u>CAACAAAUAUCUCAGUCUCCCU</u> AGAAGUGCUGCACGUUGUUG<br>GCCACGCGGGAGGCCCGGGUUCGAU <u>UCCCGGCCAUGCACCA</u>                   | 58,174 |
| BioRNA <sup>Leu</sup> /miR-7-5p   | 192 | ACCAGGAUGGCCGAGUGGUUAAGGCGUUGGACUGGCCAGCUGUGAG<br>UGUUUCUU <u>UGGAAGACUAGUGAUUUUGUUG</u> UGUGAGCAAUAGUAA<br>GGAA <u>CAACAAAUAUCUCAGUCUCCCU</u> AGAAGUGCUGCACGUUGUUG<br>GGCCC <u>GAUCCAAUGGACAUAUGUCCGCGUGGGUUCGAACCCACUC</u><br>CUGGUACCA | 62,093 |

**Supplemental Figure S1. Methods for constructing the pBSK/BioRNA plasmids.** The BioRNA<sup>Leu</sup> and BioRNA<sup>Gly</sup> plasmids were cloned using an In-Fusion cloning kit where the target inserts were amplified by two methods. In Method #1 (BioRNA<sup>Leu</sup> in this study), the inserts were obtained directly through PCR amplification using primers with 16-nt complementary base pair overlaps (**Table S2**) and then cloned into the pBSK<sub>rna</sub> vector. In Method #2 (BioRNAs<sup>Gly</sup>), the inserts were obtained through PCR amplification using respective pBSK/BioRNA<sup>Leu</sup> plasmids as templates and htRNA specific primers (**Table S2**). The resultant pBSK/BioRNA plasmids were transformed into Stellar<sup>TM</sup> Competent Cells (*E. coli* HST08 stain) for plasmid propagation and target BioRNA overexpression.

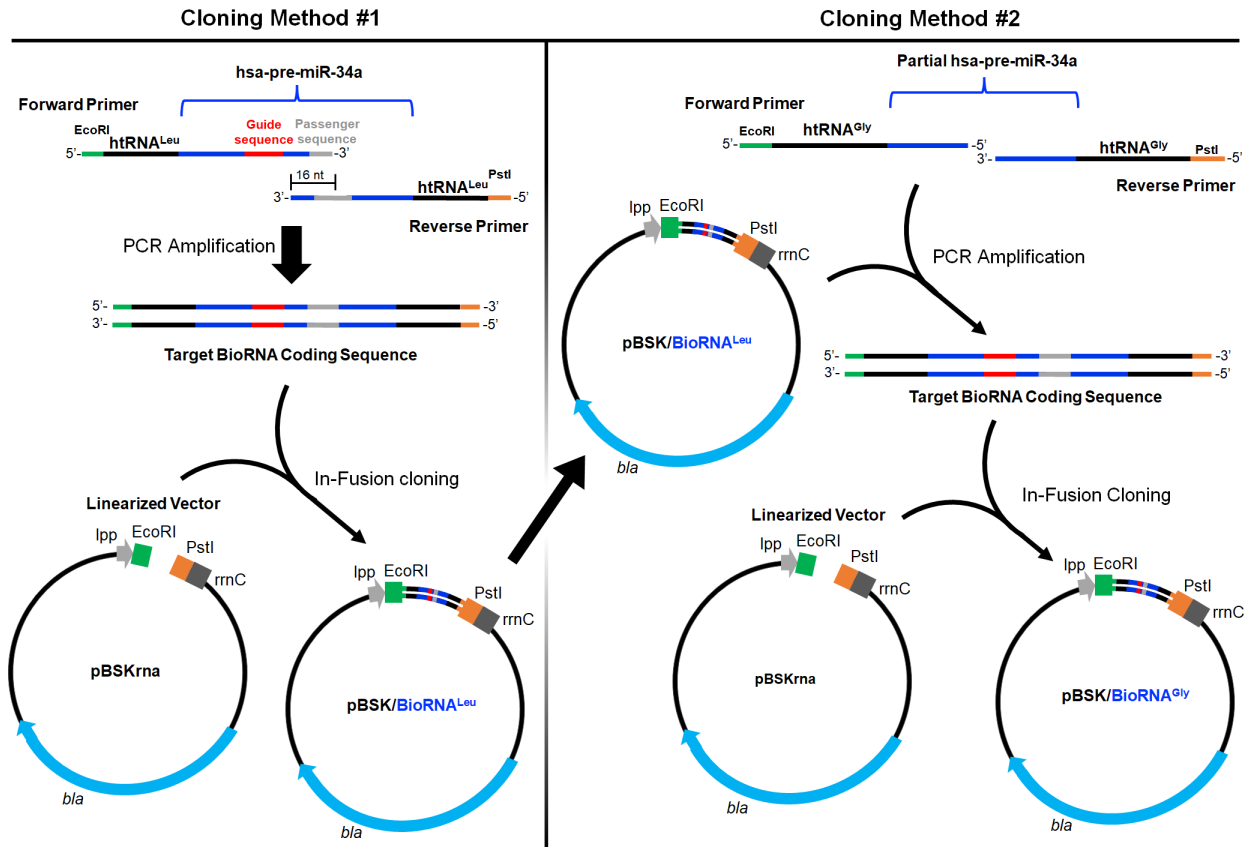

**Supplemental Figure S2. Screen for antiproliferative effects of 48 novel BioRNAs against human pancreatic cancer AsPC-1 cells.** Cell viability values were determined by CellTiter-Glo assay at 72 h post-transfection with 15 nM recombinant miRNAs, control RNAs or vehicle. Control RNA groups were set as 100%. Values are mean  $\pm$  SD (N = 4 biological replicates per group). #Several BioRNAs published recently were included for comparison. The data demonstrate an overall similar impact of the BioRNA<sup>Gly</sup>- and BioRNA<sup>Leu</sup>-based miRNA on AsPC-1 cell viability. BioRNA/miR-7-5p used for further studies are underlined. \*P < 0.05, as compared to respective control RNA (one-way ANOVA with Bonferroni post hoc tests).

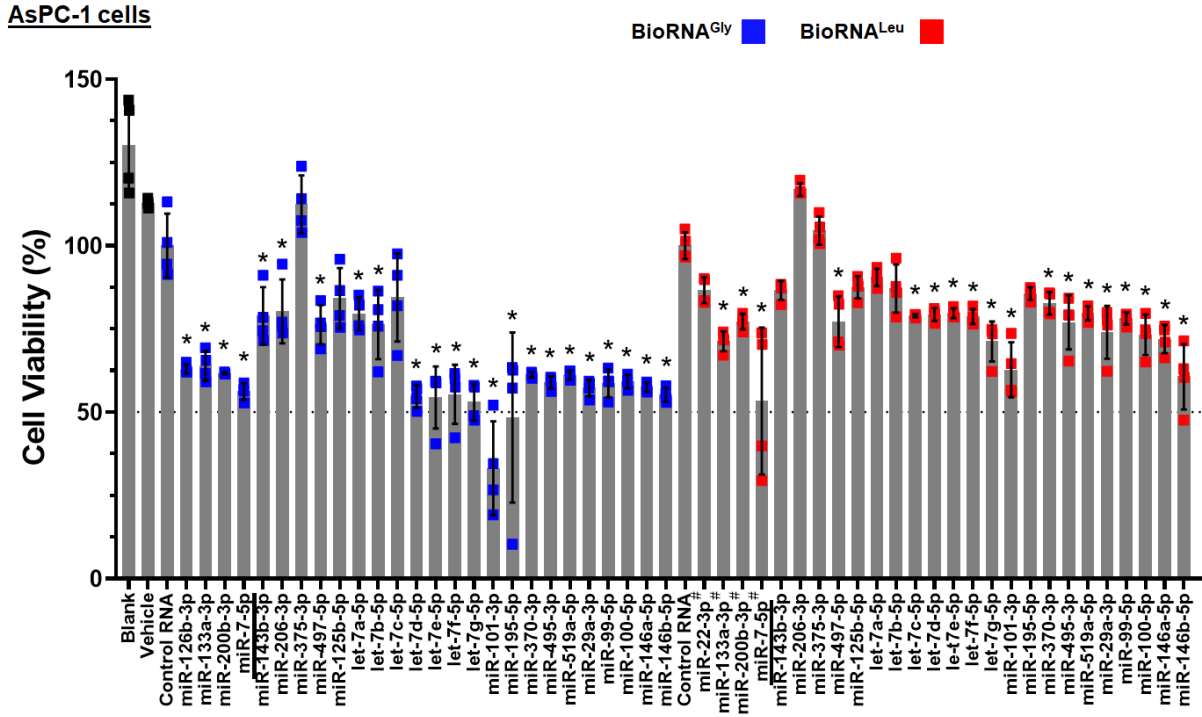

Supplement: Supplemental_Data.pdf [file Supplemental_Data.pdf]
